# Supplementary material for: A seesaw in Mediterranean precipitation during the Roman Period linked to millennial-scale changes in the North Atlantic
Source: Copernicus journal article supplement (doi:10.5194/cp-8-637-2012), 2012-03-29
Supplement: Supplementary file 1 [file cp-8-637-2012-supplement.zip]

## Sheet: Jack-knife test
	EOF 1
Record removed	a	b	c	d	e	f	g	h	i	j	k	l	Record removed	Explained Variance	Included in interpretation = 1
a		0.432109	0.163795	0.41011	-0.157459	0.185531	-0.222209	-0.380492	0.0829639	0.336069	0.421074	-0.260325	a	58.8	1
b	0.4503		0.144731	0.408121	-0.168852	0.172326	-0.228397	-0.384898	0.0640525	0.338944	0.410079	-0.25308	b	59.9	1
c	0.427159	0.399271		0.376926	-0.144391	0.166234	-0.204248	-0.347476	0.0825436	0.306009	0.387726	-0.233066	c	65.6	0
d	0.464112	0.445604	0.203791		-0.109191	0.197146	-0.184545	-0.334188	0.144373	0.298101	0.423951	-0.241942	d	59.8	1
e	0.434237	0.414868	0.187182	0.364591		0.184068	-0.173004	-0.316952	0.129602	0.283952	0.396921	-0.228292	e	66.6	0
f	0.432846	0.406705	0.161687	0.375431	-0.13604		-0.199592	-0.339122	0.0985275	0.299902	0.393261	-0.229114	f	63.5	0
g	0.438681	0.419767	0.192322	0.366773	-0.0991714	0.188632		-0.317446	0.134486	0.284946	0.401151	-0.231197	g	65	0
h	0.457847	0.443394	0.219407	0.370556	-0.0853518	0.198743	-0.164862		0.169595	0.277074	0.420278	-0.228469	h	62.9	1
i	0.424738	0.39891	0.155611	0.372805	-0.137188	0.169122	-0.19791	-0.341114		0.301199	0.38698	-0.232045	i	68.6	0
j	0.452711	0.435745	0.204609	0.372311	-0.101279	0.192191	-0.175882	-0.316701	0.151123		0.413292	-0.229392	j	62.6	1
k	0.45605	0.427491	0.160376	0.402471	-0.153898	0.179753	-0.217759	-0.373415	0.0872968	0.327477		-0.252689	k	59.5	1
l	0.443237	0.41944	0.180287	0.375246	-0.122156	0.176988	-0.190949	-0.329102	0.122398	0.292239	0.403604		l	62.8	1
													Average explained variance =	62.9667
Average loading	0.443811	0.422119	0.179436	0.381395	-0.128634	0.182794	-0.196305	-0.343719	0.115178	0.304174	0.405302	-0.238146
Std_dev loading	0.0132659	0.016377	0.0239715	0.0168711	0.0271526	0.0109797	0.0208646	0.0253239	0.0339261	0.0211946	0.0133695	0.0118367
	EOF 2
Record removed	a	b	c	d	e	f	g	h	i	j	k	l	Record removed	Explained Variance	Included in interpretation = 1
a		0.251818	0.429997	-0.068199	0.411318	0.21494	0.29498	0.278074	0.545284	-0.198644	0.172999	0.0244341	a	32.2	0
b	0.199747		0.44701	-0.0409689	0.410797	0.229734	0.288423	0.257597	0.560152	-0.178126	0.204754	0.0102503	b	30.8	0
c	0.181431	0.26963		-0.0773587	0.449382	0.224025	0.324739	0.305663	0.595767	-0.219525	0.181657	0.0353833	c	25.6	1
d	0.0696911	0.158995	0.389613		0.438254	0.170932	0.337	0.353938	0.52282	-0.26612	0.0841649	0.0818254	d	31	0
e	0.0914208	0.190581	0.429264	-0.159341		0.174965	0.337319	0.385801	0.583489	-0.300549	0.103356	0.104655	e	25.5	1
f	0.144338	0.229182	0.420329	-0.0937509	0.417196		0.302604	0.307888	0.551874	-0.225325	0.14972	0.0548412	f	28.9	0
g	0.0770112	0.172388	0.407916	-0.159692	0.439618	0.165934		0.375597	0.555803	-0.28861	0.0905262	0.100875	g	27.7	1
h	0.0218168	0.118879	0.387989	-0.201416	0.480232	0.167631	0.384164		0.530072	-0.30854	0.0393757	0.10129	h	28	1
i	0.160095	0.263269	0.490087	-0.0949608	0.501948	0.262134	0.377886	0.327218		-0.22981	0.179742	0.0141499	i	22.9	1
j	0.0526485	0.144551	0.390925	-0.167212	0.46031	0.17271	0.359248	0.370439	0.524878		0.0708743	0.0838618	j	29.1	0
k	0.163674	0.24961	0.427207	-0.0719902	0.412392	0.21127	0.296698	0.280926	0.547313	-0.202989		0.0284656	k	31.4	0
l	0.0999765	0.189134	0.401072	-0.123859	0.428527	0.186519	0.323067	0.326254	0.526894	-0.242151	0.111983		l	30.2	0
													Average explained variance =	28.6083
Average loading	0.114714	0.203458	0.420128	-0.114432	0.440907	0.198254	0.329648	0.32449	0.549486	-0.241854	0.126286	0.0581847
Std_dev loading	0.0580571	0.051984	0.0302937	0.0510127	0.030067	0.032008	0.0332773	0.0430314	0.0238408	0.0436152	0.0540547	0.0372134
													EOF1 + EOF2
													Record removed	Exp_var EOF 1 + EOF2
													a	91
													b	90.7
													c	91.2
													d	90.8
													e	92.1
													f	92.4
													g	92.7
													h	90.9
													i	91.5
													j	91.7
													k	90.9
													l	93
													Average explained variance =	91.575
